# Supplementary material
Source: HighWire-hosted journal article supplement (https://cmajopen-stage.highwire.org/highwire/filestream/81151/field_highwire_adjunct_files/1/original-submission.pdf)
Supplement: original-submission.pdf [file original-submission.pdf]

## Title

Benefits, Challenges and Ethical Principles Associated with Implementing Non-invasive Prenatal Testing: A Delphi Study

## Authors

Charles Dupras PhD, Stanislav Birko BSc, Aliya Affdal MSc, Hazar Haidar PhD, Marie-Eve Lemoine MSc, Vardit Ravitsky PhD

## Running Title

Implementing Non-invasive Prenatal Testing

## Abstract (249 words)

**Background:** Non-invasive prenatal testing is a recent technology that provides some genetic information about the fetus through the analysis of cell-free fetal DNA circulating in maternal blood. This study aimed to identify the benefits, challenges and guiding ethical principles most relevant to the clinical integration of non-invasive prenatal testing in Canada, according to experts throughout the country.

**Methods:** We conducted a 3-round Delphi study with Canadian experts of contemporary discussions about the ethical and societal implications of prenatal testing and/or genomic technologies. In Round 1, we asked participants (N=61; participation=20.2%) to identify clinical benefits and challenges related to the implementation of non-invasive prenatal testing in Canada, and ethical principles they think should guide it. In Round 2, we asked them (N=58; retention=95.1%) to select the most important elements stated by their peers. In Round 3, participants (N=49; retention=84.5%; overall retention=80.3%) were informed of the aggregated results from round 2, and invited to revise or confirm their selection.

**Results:** This paper presents and discusses three lists of benefits (N=10), challenges (N=27), and ethical principles (N=16) identified and prioritized by Canadian experts as most relevant to the implementation of non-invasive prenatal testing in Canada.

**Interpretation:** While pointing to a large diversity of potential issues, Canadian experts agreed on two sets of requirements for a responsible implementation of non-invasive prenatal testing in Canada: ethical requirements to actively promote free and informed decision-making on the part of prospective parents; and societal requirements to protect and promote the rights and interests of vulnerable individuals.

**Keywords:** Non-invasive prenatal testing, Delphi study, ethics, reproductive autonomy, decision-making, experts, knowledge translation, responsible innovation, Canada.

**Number of words:** 2599

## Introduction

Non-invasive prenatal testing (NIPT) allows genetic testing through the analysis of cell-free fetal DNA (cffDNA) circulating in maternal blood. Although not as accurate as diagnostic tests such as amniocentesis or chorionic villus sampling, non-invasive prenatal testing may provide important benefits for pregnant women and their families. In contrast with invasive methods, it carries no risk of miscarriage. Non-invasive prenatal testing can also be performed early in the pregnancy (week 10-11) and has better detection rates than current first tier screening methods. The test is thus being gradually implemented worldwide. It is currently available in over 60 countries,<sup>1</sup> commercially in most, and covered by public funding in some. To date, in Canada, the provinces of Ontario and British Columbia offer public funding for non-invasive prenatal testing, but only under specific conditions.<sup>2,3</sup> More recently, the Quebec Ministry of Health announced that it will cover its use for high-risk pregnancies.<sup>4</sup>

Scholars and advocacy groups have expressed concerns regarding the potential consequences of ‘routinizing’ non-invasive prenatal testing.<sup>5,6</sup> These concerns include an erosion of free and informed consent, as well as the possibility of increasing termination rates, leading to decreased prevalence of certain genetic conditions, which may lead to a decrease in medical and social support for people and families living with these conditions.<sup>7-10</sup> It is therefore important to empirically assess the ethical and societal acceptability of non-invasive prenatal testing’s clinical implementation and coverage through public funding, to ascertain that they reflect the interests, needs and values of Canadians.<sup>11</sup> Such decisions should be based on robust evidence regarding cost-effectiveness<sup>12</sup>, and on the views and preferences of stakeholders.<sup>13</sup> In addition, we argue, these decisions should be informed by the evolving perspectives of Canadian experts on ethical and societal issues related to prenatal testing and/or genomic technologies. This study aimed to identify the most important benefits, challenges and guiding ethical principles regarding the clinical integration of non-invasive prenatal testing in Canada, according to such experts.

## Methods

The Ethical Delphi technique, an “approach for characterizing ethical issues raised by the use of novel biotechnologies”, was ideally suited to the aim of this study.<sup>14</sup> The classical Delphi method consists in surveying a panel of experts on a given topic, providing the panel with aggregate results, and obtaining feedback on the results in subsequent rounds. It promotes an honest, evolving and constructive exchange between people from diverse backgrounds aiming to identify areas of agreement and disagreement regarding emerging areas of knowledge.<sup>15,16</sup> It is a semi-anonymous method in which research participants are known to investigators but not to one another. Preserving such anonymity provides the respondents with the freedom to change their opinion from one round to the next, rather than defending a locked-in position with their name attached to it.<sup>17</sup> We conducted a 3-round Ethical Delphi study with participants with a diversity of experience with, knowledge of, and perspectives on the ethical and societal aspects of prenatal testing and/or genomic technologies.

### *Recruitment of the expert panel*

We identified as potential participants individuals who had been actively involved in previous scholarly (e.g., academic literature) and/or public (e.g., newspaper articles) discussions on the ethical and societal aspects of prenatal testing and/or genomic technologies, and relevant

1  
2  
3 professional or advocacy activities in Canada for at least 3 years. Individuals from four groups  
4 were recruited: healthcare professionals (N=17), researchers in social sciences and humanities  
5 (N=17), patient/disability rights advocates (N=17), and cultural/religious community advocates  
6 (N=10). Before completing round 1, participants were asked to confirm that they indeed  
7 identified as belonging to one of the four groups, and to specify their professional/academic or  
8 advocacy expertise (Table 1). We aimed for 10-15 respondents per group,<sup>17,18</sup> trying to ensure a  
9 >70% response rate in each round to minimize selective participant retention bias.<sup>19,20</sup> Special  
10 efforts were made during recruitment to account for language distribution, gender ratio, and  
11 geographic representation. A total number of 302 potential participants were thus gradually  
12 invited by email to this non-remunerated study, 61 of whom completed round 1 (initial  
13 participation rate: 20.2%).  
14  
15

### 16 ***Questionnaires and analysis***

17  
18 In round 1 (May-August 2015), research participants were asked to provide demographic and  
19 other relevant information about themselves. Using open-ended questions, we also invited them  
20 to state, in their own words, the most important “clinical benefits”, “ethical, legal, and social  
21 issues and concerns”, and “moral principles, social norms and values” related to the  
22 implementation of non-invasive prenatal testing in Canada. We formulated these questions as  
23 broadly as possible to avoid orienting participants’ responses from the outset. For the same  
24 reason, we deliberately avoided importing concerns from the existing literature at any round of  
25 this study. Upon completion of round 1, Birko and Dupras independently assessed participants’  
26 responses, and clustered qualitative data using NVivo 10 (QSR International).  
27  
28

29 Following the process outlined by Burnard (1991),<sup>21</sup> three lists of non-redundant benefits  
30 (N=10), challenges (N=27) and guiding ethical principles (N=16) relevant to the implementation  
31 of non-invasive prenatal testing in Canada, were obtained. The second round (January-April  
32 2016) questionnaire was created based on the responses and exact terminology employed by  
33 research participants in round 1. Using multiple-choice questions, we asked participants to select  
34 the most important benefits, challenges and principles that had been formulated by their peers,  
35 according to a) their own opinion, and b) their estimation of public opinion. The third round  
36 (September-December 2016) consisted of an identical set of multiple-choice questions,  
37 complemented by a quantitative presentation of the aggregate responses from round 2. Informed  
38 by the panel’s position, participants had the opportunity to revise or confirm their responses. The  
39 three rounds were piloted by Haidar and Lemoine for face and content validity.  
40  
41  
42

### 43 ***Ethics approval***

44 *Fonds du Québec pour la recherche – Santé et Culture* provided funding for this project  
45 (FQRSC, #2014-NP-175854). We obtained ethics approval from the University of Montréal  
46 CÉRES (#14-104-CERES-D) prior to each round.  
47  
48  
49

50 [ADD TABLE 1 HERE: PANEL COMPOSITION]  
51  
52

53  
54 [ADD TABLE 2 HERE: INFORMATION ABOUT PARTICIPANTS]  
55  
56  
57  
58  
59  
60

## Results

Of the 61 experts who completed round 1, 95.1% completed round 2 (N=58/61), of whom 84.5% completed round 3 (N=49/58). The resulting overall retention rate is 80.3% (N=49/61), with rates well over the 70% per round usually recommended for Delphi studies.<sup>22</sup> Among participants who completed the three rounds, 30.6% were healthcare professionals (N=15/49), 28.6% were researchers in social sciences and humanities (N=14/49), 28.6% were patient/disability rights advocates (N=14/49), and 12.2% were cultural/religious communities advocates (N=6/49) (Table 1). Our initial panel was highly heterogeneous in terms of participants' opinion about the "overall acceptability" of non-invasive prenatal testing in Canada, inquired using a Likert scale (1-7), with 55.1% (N=35/61) perceiving the test as *mostly acceptable* (1, 2 or 3), and 28.6% (N=17/61) viewing it as *mostly unacceptable* (5, 6 or 7). Such diversity was important given our objective of characterizing as many different views and concerns as possible. Table 3 presents the final lists of prioritized benefits, challenges and principles, as ranked by the panel following round 3.

[ADD TABLE 3ABC HERE: BENEFITS, CHALLENGES AND PRINCIPLES]

## Interpretation

### Summary

This paper reports the benefits and challenges related to the implementation of non-invasive prenatal testing in Canada, and the ethical principles that should guide it, according to local experts of ethical and societal issues in prenatal testing and genomic technologies. Throughout the three rounds, we paid special attention to reporting the exact terminology employed by research participants when stating benefits, challenges and principles. Our study thus has the advantage of offering a detailed landscape of the vocabulary used in practice by experts from diverse epistemological standpoints. Although many participants assigned value to non-invasive prenatal testing because of its 'increased accuracy', probably in contrast to current first tier screening methods, the panel largely agreed that the test's most salient benefits arise when comparing non-invasive prenatal testing to current second tier diagnostic methods ('no risk of miscarriage', 'non-invasiveness' and 'results available earlier in the pregnancy'). Our study thus confirms the main clinical benefits of non-invasive prenatal testing usually expected and discussed in the literature (safer, easier, earlier).<sup>11</sup> The panel expected the public to agree with the high ranking of these benefits, but believed Canadians could also be attracted by the idea that the new test 'provides more information potentially useful for decision-making' (supp. file). After carefully analyzing challenges and principles, we argue that our study points to two sets of requirements that should be prioritized according to Canadian experts: ethical requirements to actively promote free and informed decision-making for prospective parents; and societal requirements to protect and promote the rights and interests of vulnerable individuals.

### Actively promoting free and informed decision-making

Participants unambiguously stressed how challenging offering ‘adequate counseling to patients’ can be, and yet largely agreed on the high importance of ‘informed decision-making’ in the context of prenatal care. Our findings thus resonate with the literature expressing concerns about the potential impact on informed decision-making of implementing non-invasive prenatal testing as “just another blood test”<sup>23-26</sup> and advocating the active promotion of women’s reproductive autonomy.<sup>27-30</sup> In addition to protecting ‘free choice’, participants in our study underscored the need to ensure the appropriate conditions for ‘evidence-based decision-making’. In this respect, they highlighted the difficulty of ensuring the ‘adequate education of health professionals’ about cutting-edge prenatal testing technologies and their potential ethical and societal implications.

Interestingly, the term ‘autonomy’ itself did not rank very high in the final list of principles. This concept may have been perceived as too vague by most participants, and/or not best reflecting what is truly at stake with the arrival of non-invasive prenatal testing in Canada. The term ‘consent’ also ranked surprisingly low on the list of challenges, suggesting that while Canadian experts value informed choice, they may believe that procedural modalities of signed consent forms are insufficient to adequately promote it.<sup>31</sup> In the context of non-invasive prenatal testing, promoting reproductive autonomy and protecting consent by prospective parents may instead require enhanced training of healthcare professionals regarding how to best communicate new testing options to patients, and the importance of understanding individual patients’ preferences. Preventing increased ‘pressure to test’ and ‘pressure to terminate’ – anticipated consequences of implementing non-invasive prenatal testing in routine prenatal care – is particularly crucial, given our participants’ estimation of free choice ranking first according to Canadians (supp. file). In the literature, such concerns have consistently been formulated by disability rights advocates, who fear that the emergence of new medical and social norms in prenatal testing may impose coercive pressures on pregnant women to test and terminate affected pregnancies masked as “responsible motherhood”, thus impeding the voluntary nature of their individual choices.<sup>8,32-36</sup>

Some empirical studies have shown that health care professionals tend to be in favor of testing and terminating affected pregnancies and may thus exercise subtle yet considerable influence on their patient’s decision-making process and final choice.<sup>34,37</sup> At the same time, some patients may expect clear recommendations from their health care provider, deliberately and admittedly intending to follow them.<sup>9</sup> To address the imperative of protecting free choice through the provision of relevant, adequate and sufficient information,<sup>38</sup> different strategies exist, such as *non-directive counseling* (focused on the patient’s decisional authority) or *shared decision-making* (focused on open discussion of personal values and opinions).<sup>39,40</sup> These strategies can increase a person’s freedom of choice by improving their understanding of the available options.<sup>41-43</sup>

### **Protecting and promoting the rights and interests of vulnerable individuals**

Over half the participants feared that the implementation of non-invasive prenatal testing may lead to increased ‘discrimination against disabled individuals’. Many also shared concerns over ‘eugenics’, and a ‘potential decrease in social support for disabled individuals’ in the future. They estimated that the threat of eugenics ranks even higher in public opinion (second in the list of challenges; supp. file). Perhaps in response to these challenges, the principle of ‘respect for human dignity’ was perceived by the panel as very important for guiding the implementation of non-invasive prenatal testing in Canada. Many participants also underscored the need to continuously promote ‘respect for diversity’, and ‘solidarity with individuals living with the

1  
2  
3 tested conditions'. These principles point to the societal imperative of being actively committed  
4 to the welfare of vulnerable groups. Disability scholarship literature has been useful in  
5 highlighting areas of needed improvement in this regard.<sup>44-46</sup>  
6

7 While the 'cost of implementing' non-invasive prenatal testing did not rank high, most stressed  
8 the importance of ensuring 'equitable access' to the test. Indeed, if it is available only to those  
9 who can afford it, already vulnerable individuals or populations could be unfairly disadvantaged  
10 by not being offered the same opportunity to manage risks such as: a) the risk of miscarriage  
11 associated with publicly covered invasive techniques (e.g., amniocentesis), and b) the perceived  
12 burden (e.g., psychological, financial) of raising a child with a severe genetic condition.<sup>40,47</sup> It is  
13 worth noting that the cost of implementing non-invasive prenatal testing was estimated to rank  
14 first as challenge in public opinion. It remains unclear, however, whether the public is expected  
15 to be concerned about the economic burden being imposed on prospective parents (private  
16 funding) or on the healthcare budget (public funding). Empirical studies will be helpful in  
17 determining the specific criteria (e.g., level of risk, conditions tested for, paid out of pocket or  
18 publicly covered) the Canadian public and stakeholders think satisfy the principle of equitable  
19 access.  
20  
21  
22

### 23 **Limitations**

24 We experienced difficulty in recruiting advocates of cultural/religious community advocates who  
25 had previously expressed their views regarding prenatal testing and/or genomic technologies. A  
26 plausible reason is that few may have considered themselves sufficiently knowledgeable about  
27 non-invasive prenatal testing and competent to engage in this study. The resulting lower number  
28 of participants in this group, however, should not be perceived as impeding the scientific validity  
29 of the results. In fact, our objective was not to *compare* the views of diverse groups of experts  
30 and search for statistically significant associations, but rather to shed light on a diversity of  
31 perspectives regarding non-invasive prenatal testing. The specific composition of our panel of  
32 experts (Tables 1 and 2) and the associated limitations should be considered when interpreting  
33 the results and their meaning for Canadian policy.  
34  
35  
36  
37

38 Being a pregnant woman or an individual living with a condition tested by non-invasive prenatal  
39 testing was not considered sufficient conditions to be invited to participate in this Delphi study.  
40 Empirical studies with Canadian stakeholders (e.g., PEGASUS surveys with pregnant women  
41 and their partners) will be instrumental in guiding policy-making.<sup>13</sup> However, in this study, we  
42 did not consider such stakeholders as 'experts of ethical and societal discussions related to  
43 prenatal testing and/or genomic technologies'. As reported in Table 2, women participants  
44 nevertheless represented more than half of the panel in each round, with 44.9% of the final panel  
45 (N=22/49) having experienced prenatal testing in the past. Considerable numbers of participants  
46 also reported either knowing a child (N=42/49), having a child (N=12/49), or living themselves  
47 (N=4/49) with a disability.  
48  
49  
50

### 51 **Conclusions**

52 In addition to the ethical and societal considerations discussed above, it is worth noting that some  
53 of the issues highlighted by smaller proportions of participants in this study are also informative  
54 and should be considered. This is especially important if we care to consider the voices of  
55  
56  
57  
58  
59  
60



persons with specific vulnerabilities, who due to their unique experiences of exclusion, may be more aware of and sensitive to particular ethical and societal issues related, for instance, to potential ‘decreases in social diversity’ that may follow increases in ‘selective pregnancy termination’. Potential ‘conflicts of interest linked to the commercialization of’ non-invasive prenatal testing is another example of challenge that should be addressed. Otherwise, in the long term, the rise of distrust by some individuals towards the medical community could further impede effective communication about prenatal testing options between healthcare professionals and some of their patients. Thus, interdisciplinary appraisals of such issues may also be instrumental to responsible policy-making related to the implementation of non-invasive prenatal testing in Canada.

## Aknowledgements

The authors would like to thank all the participants involved in this study, as well as Dr. Anne-Marie Laberge and Jessica Le Clerc-Blain for insightful comments and suggestions regarding the design of this study and interpretation of the results. We are also grateful to the *Fonds du Québec pour la recherche – Santé et Culture* (FQRSC) for providing funding for this research project.

## References

1. Chandrasekharan S, Minear MA, Hung A, Allyse M. Noninvasive prenatal testing goes global. *Science translational medicine*. 2014;6(231):231fs215.
2. Vanstone M, Yacoub K, Giacomini M, et al. Women's experiences of publicly funded non-invasive prenatal testing in Ontario, Canada: considerations for health technology policy-making. *Qualitative health research*. 2015;25(8):1069-1084.
3. Perinatal services BC. *NIPT funding available for eligible women at high risk*. 2016; [http://www.perinatalservicesbc.ca/about/news-stories/stories/non-invasive-prenatal-testing-\(nipt\)](http://www.perinatalservicesbc.ca/about/news-stories/stories/non-invasive-prenatal-testing-(nipt)) Accessed 2017 dec. 1.
4. Dion M. Trisomie : premier financement public à grande échelle pour un test d’ADN. 2018; <https://ici.radio-canada.ca/nouvelle/1096429/trisomie-test-adn-financement-public-quebec>. Accessed 2018 aug. 16.
5. Gekas J, Langlois S, Ravitsky V, et al. Non-invasive prenatal testing for fetal chromosome abnormalities: review of clinical and ethical issues. *The application of clinical genetics*. 2016;9:15.
6. Birko S, Lemoine M-E, Nguyen MT, Ravitsky V. Moving Towards Routine Non-Invasive Prenatal Testing (NIPT): Challenges Related to Women’s Autonomy. *OBM Genetics*. 2018;2(2):1-14.
7. Hall A, Bostanci A, John S. *Ethical, legal and social issues arising from cell-free fetal DNA technologies. Appendix III to the report: Cell-free fetal nucleic acids for noninvasive prenatal diagnosis*. 2009; [http://www.phgfoundation.org/download/ffdna/ffdna\\_appendix.pdf](http://www.phgfoundation.org/download/ffdna/ffdna_appendix.pdf). Accessed 2017 dec. 1
8. Kaposy C. A disability critique of the new prenatal test for Down syndrome. *Kennedy Institute of Ethics journal*. 2013;23(4):299-324.

- 1
  - 2
  - 3
  - 4
  - 5
  - 6
  - 7
  - 8
  - 9
  - 10
  - 11
  - 12
  - 13
  - 14
  - 15
  - 16
  - 17
  - 18
  - 19
  - 20
  - 21
  - 22
  - 23
  - 24
  - 25
  - 26
  - 27
  - 28
  - 29
  - 30
  - 31
  - 32
  - 33
  - 34
  - 35
  - 36
  - 37
  - 38
  - 39
  - 40
  - 41
  - 42
  - 43
  - 44
  - 45
  - 46
  - 47
  - 48
  - 49
  - 50
  - 51
  - 52
  - 53
  - 54
  - 55
  - 56
  - 57
  - 58
  - 59
  - 60
9. Tischler R, Hudgins L, Blumenfeld YJ, et al. Noninvasive prenatal diagnosis: pregnant women's interest and expected uptake. *Prenatal diagnosis*. 2011;31(13):1292-1299.
10. Van Schendel RV, Kleinveld JH, Dondorp WJ, et al. Attitudes of pregnant women and male partners towards non-invasive prenatal testing and widening the scope of prenatal screening. *European Journal of Human Genetics*. 2014;22(12):1345.
11. Haidar H, Dupras C, Ravitsky V. Non-invasive prenatal testing: review of ethical, legal and social implications. *BioéthiqueOnline*. 2016;5.
12. Murdoch B, Ravitsky V, Ogbogu U, et al. Non-invasive prenatal testing and the unveiling of an impaired translation process. *Journal of Obstetrics and Gynaecology Canada*. 2017;39(1):10-17.
13. PEGASUS : PErsonalized Genomics for prenatal Aneuploidy Screening USing maternal blood (2013-2017); <http://pegasus-pegase.ca/pegasus/about-the-project/>. Accessed 2018 aug. 16.
14. Millar K, Thorstensen E, Tomkins S, Mephram B, Kaiser M. Developing the ethical Delphi. *J Agr Environ Ethic*. 2007;20(1):53-63.
15. Goodman CM. The Delphi technique - a critique. *Journal of advanced nursing*. 1987;12(6):729-734.
16. Dalkey N, Brown B, Cochran S. *The Delphi method: an experimental study of group opinion*. Santa Monica (CA): Rand Corporation; 1969.
17. Delbecq AL, Van de Ven AH, Gustafson DH. *Group techniques for program planning : a guide to nominal group and Delphi processes*. Glenview (Ill). Scott, Foresman; 1975.
18. Skulmoski GJ, Hartman FT, Krahn J. The Delphi method for graduate research. *Journal of Information Technology Education*. 2007;6:1-21
19. Walker A, Selfe J. The Delphi method: a useful tool for the allied health researcher. *British Journal of Therapy and Rehabilitation*. 1996;3:677-681.
20. Sumsion T. The Delphi technique: an adaptive research tool. *British Journal of Occupational Therapy*. 1998;61:153-156.
21. Burnard P. A method of analysing interview transcripts in qualitative research. *Nurse education today*. 1991;11(6):461-466.
22. Hasson F, Keeney S, McKenna H. Research guidelines for the Delphi survey technique. *Journal of advanced nursing*. 2000;32(4):1008-1015.
23. Lewis C, Silcock C, Chitty LS. Non-Invasive Prenatal Testing for Down's Syndrome: Pregnant Women's Views and Likely Uptake. *Public health genomics*. 2013.
24. Lewis C, Hill M, Chitty LS. A qualitative study looking at informed choice in the context of non-invasive prenatal testing for aneuploidy. *Prenatal Diagnosis*. 2016.
25. van Schendel RV, van El CG, Pajkrt E, Henneman L, Cornel MC. Implementing non-invasive prenatal testing for aneuploidy in a national healthcare system: global challenges and national solutions. *BMC Health Services Research*. 2017;17(1):670.
26. Vanstone M, Cernat A, Nisker J, Schwartz L. Women's perspectives on the ethical implications of non-invasive prenatal testing: a qualitative analysis to inform health policy decisions. *BMC medical ethics*. 2018;19(1):27.
27. Benn P, Cuckle H, Pergament E. Non-invasive prenatal testing for aneuploidy: current status and future prospects. *Ultrasound in obstetrics & gynecology : the official journal of the International Society of Ultrasound in Obstetrics and Gynecology*. 2013;42(1):15-33.



- 1
- 2
- 3
- 4 28. Hewison J. Psychological aspects of individualized choice and reproductive autonomy in
- 5 prenatal screening. *Bioethics*. 2015;29(1):9-18.
- 6 29. Chen A, Tenhunen H, Torkki P, et al. Considering medical risk information and
- 7 communicating values: a mixed-method study of women's choice in prenatal testing.
- 8 *PloS one*. 2017;12(3):e0173669.
- 9 30. Lewis C, Silcock C, Chitty LS. Non-invasive prenatal testing for Down's syndrome:
- 10 pregnant women's views and likely uptake. *Public health genomics*. 2013;16(5):223-232.
- 11 31. Seavilleklein V. Challenging the rhetoric of choice in prenatal screening. *Bioethics*.
- 12 2009;23(1):68-77.
- 13 32. Asch A, Barlevy D. Disability and genetics: a disability critique of pre-natal testing and
- 14 pre-implantation genetic diagnosis (PGD). In: *Encyclopedia of Life Science E*, ed.
- 15 Chichester: John Wiley & Sons; 2012.
- 16 33. Ho A. Relational autonomy or undue pressure? Family's role in medical decision-making.
- 17 *Scandinavian journal of caring sciences*. 2008;22(1):128-135.
- 18 34. Klein DA. Medical disparagement of the disability experience: empirical evidence for the
- 19 "expressivist objection". *AJOB primary research*. 2011;2(2):8-20.
- 20 35. Wasserman D, Asch A. Reply to Nelson. *Cambridge quarterly of healthcare ethics : CQ*
- 21 *: the international journal of healthcare ethics committees*. 2007;16(4):478-482.
- 22 36. Ravitsky V. The Shifting Landscape of Prenatal Testing: Between Reproductive
- 23 Autonomy and Public Health. *The Hastings Center report*. 2017;47 Suppl 3:S34-S40.
- 24 37. Madeo AC, Biesecker BB, Brasington C, et al. The relationship between the genetic
- 25 counseling profession and the disability community: a commentary. *American journal of*
- 26 *medical genetics Part A*. 2011;155A(8):1777-1785.
- 27 38. Garcia E, Timmermans DR, van Leeuwen E. Rethinking autonomy in the context of
- 28 prenatal screening decision-making. *Prenatal diagnosis*. 2008;28(2):115-120.
- 29 39. Sachs A, Blanchard L, Buchanan A, Norwitz E, Bianchi DW. Recommended pre-test
- 30 counseling points for noninvasive prenatal testing using cell-free DNA: a 2015
- 31 perspective. *Prenatal diagnosis*. 2015;35(10):968-971.
- 32 40. Dondorp W, De Wert G, Bombard Y, et al. Non-invasive prenatal testing for aneuploidy
- 33 and beyond: challenges of responsible innovation in prenatal screening. *European*
- 34 *Journal of Human Genetics*. 2015;23(11):1438.
- 35 41. Vanstone M, Kinsella EA, Nisker J. Information-sharing to promote informed choice in
- 36 prenatal screening in the spirit of the SOGC clinical practice guideline: a proposal for an
- 37 alternative model. *Journal of obstetrics and gynaecology Canada : JOGC = Journal*
- 38 *d'obstetrique et gynecologie du Canada : JOGC*. 2012;34(3):269-275.
- 39 42. Barnes B. *Understanding agency social theory and responsible action*. London (UK):
- 40 Sage; 2000.
- 41 43. Rehmann-Sutter C. Why non-directiveness is insufficient: ethics of genetic decision
- 42 making and a model of agency. *Medicine Studies* 2009;1(2):113-129.
- 43 44. Alderson P. Down's syndrome: cost, quality and value of life. *Social science & medicine*.
- 44 2001;53(5):627-638.
- 45 45. McCarthy H. The disability rights movement: experiences and perspectives of selected
- 46 leaders in the disability community. *Rehabil Counsel Bull* 2003(46):209-223.
- 47 46. Raz A. "Important to test, important to support": attitudes toward disability rights and
- 48 prenatal diagnosis among leaders of support groups for genetic disorders in Israel. *Social*
- 49 *science & medicine*. 2004;59(9):1857-1866.
- 50
- 51
- 52
- 53
- 54
- 55
- 56
- 57
- 58
- 59
- 60

1  
2  
3  
4  
5  
6  
7  
8  
9  
10  
11  
12  
13  
14  
15  
16  
17  
18  
19  
20  
21  
22  
23  
24  
25  
26  
27  
28  
29  
30  
31  
32  
33  
34  
35  
36  
37  
38  
39  
40  
41  
42  
43  
44  
45  
46  
47  
48  
49  
50  
51  
52  
53  
54  
55  
56  
57  
58  
59  
60

47. de Jong A, Dondorp WJ, Frints SG, et al. Advances in prenatal screening: the ethical dimension. *Nature reviews Genetics*. 2011;12(9):657-663.

Confidential

**Table 1. Panel composition**

<sup>1</sup> We chose not to report the name of associations some experts had mentioned being affiliated with to protect the privacy of participants.

|                                                         | <b>Nb. of participants</b> |                |                |
|---------------------------------------------------------|----------------------------|----------------|----------------|
|                                                         | <b>Round 1</b>             | <b>Round 2</b> | <b>Round 3</b> |
| <b>Health care professionals</b>                        | <b>17</b>                  | <b>16</b>      | <b>15</b>      |
| Gynecologists-Obstetricians                             | 4                          | 3              | 3              |
| Genetic counselors                                      | 3                          | 3              | 3              |
| Neonatalogists                                          | 3                          | 3              | 3              |
| Medical geneticists                                     | 2                          | 2              | 2              |
| Midwife                                                 | 1                          | 1              | 1              |
| Nurse                                                   | 1                          | 1              | 1              |
| Pediatrician                                            | 1                          | 1              | 1              |
| Other                                                   | 2                          | 2              | 1              |
| <b>Social science and humanities researchers</b>        | <b>17</b>                  | <b>17</b>      | <b>14</b>      |
| History                                                 | 4                          | 4              | 4              |
| Law                                                     | 3                          | 3              | 2              |
| Bioethics                                               | 2                          | 2              | 2              |
| Sociology                                               | 1                          | 1              | 1              |
| Anthropology                                            | 1                          | 1              | 0              |
| Philosophy                                              | 1                          | 1              | 0              |
| Other                                                   | 5                          | 5              | 5              |
| <b>Patients/disability rights advocates<sup>1</sup></b> | <b>17</b>                  | <b>16</b>      | <b>14</b>      |
| Association promoting social values                     | 6                          | 6              | 6              |
| Association specific to Down syndrome                   | 4                          | 4              | 4              |
| Association specific to an other condition              | 2                          | 1              | 0              |
| Involved in more than one association                   | 2                          | 2              | 2              |
| Not affiliated to any association                       | 3                          | 3              | 2              |
| <b>Cultural/religious community advocates</b>           | <b>10</b>                  | <b>9</b>       | <b>6</b>       |
| Muslims                                                 | 3                          | 3              | 2              |
| Christians                                              | 2                          | 2              | 2              |
| Jews                                                    | 2                          | 2              | 1              |
| First Nations                                           | 1                          | 0              | 0              |
| Other                                                   | 2                          | 2              | 1              |
| <b>TOTAL</b>                                            | <b>61</b>                  | <b>58</b>      | <b>49</b>      |

1  
2  
3  
4  
5  
6  
7  
8  
9  
10  
11  
12  
13  
14  
15  
16  
17  
18  
19  
20  
21  
22  
23  
24  
25  
26  
27  
28  
29  
30  
31  
32  
33  
34  
35  
36  
37  
38  
39  
40  
41

**Table 2. Information about participants**

**A. Demographics**

**B. Potentially influencing factors**

- 1. Participants speaking other languages all together counted for 4.1% at round 3.
- 2. Residents of other provinces or territories all together counted for 8.2% at round 3.
- 3. One participant had an other level of education but did not complete round 3.

|                                     |                                       | % of participants |         |         |      |
|-------------------------------------|---------------------------------------|-------------------|---------|---------|------|
|                                     |                                       | Round 1           | Round 2 | Round 3 |      |
| <b>A</b>                            | <b>Language<sup>1</sup></b>           | English           | 70.5    | 70.7    | 69.4 |
|                                     |                                       | French            | 26.2    | 25.9    | 26.5 |
|                                     | <b>Sex</b>                            | Female            | 55.7    | 56.9    | 57.1 |
|                                     |                                       | Male              | 44.3    | 43.1    | 42.9 |
|                                     | <b>Age</b>                            | 20-39             | 16.4    | 17.2    | 18.4 |
|                                     |                                       | 40-59             | 49.2    | 48.3    | 46.9 |
|                                     |                                       | 60-79             | 32.8    | 32.8    | 34.7 |
|                                     |                                       | 80-99             | 1.6     | 1.7     | ---  |
|                                     | <b>Country of birth</b>               | Canada            | 68.9    | 67.2    | 69.4 |
|                                     | <b>Residence<sup>2</sup></b>          | Québec            | 39.3    | 39.6    | 38.8 |
|                                     |                                       | Ontario           | 26.2    | 25.9    | 26.5 |
|                                     |                                       | Alberta           | 9.8     | 10.3    | 8.2  |
|                                     |                                       | British Columbia  | 8.2     | 8.6     | 8.2  |
|                                     |                                       | Manitoba          | 6.6     | 5.2     | 6.1  |
|                                     | Nova Scotia                           | 3.3               | 3.4     | 4.1     |      |
| <b>Degree completed<sup>3</sup></b> | Doctoral                              | 60.7              | 60.3    | 61.2    |      |
|                                     | Masters                               | 14.8              | 15.5    | 18.4    |      |
|                                     | Bachelor                              | 11.5              | 12.1    | 10.2    |      |
|                                     | College                               | 11.5              | 10.3    | 10.2    |      |
| <b>B</b>                            | Have a child living with a disability | 23.0              | 22.4    | 24.5    |      |
|                                     | Know a child living with a disability | 86.9              | 86.2    | 85.7    |      |
|                                     | Live with a disability                | 8.2               | 8.6     | 8.2     |      |
|                                     | Experienced prenatal screening        | 47.5              | 43.1    | 44.9    |      |
|                                     | Experienced prenatal diagnosis        | 18.0              | 17.2    | 16.3    |      |
|                                     | Disclosed a commercial interest       | 1.6               | 1.7     | 2.0     |      |

**Table 3. Most important benefits (A), challenges (B) and guiding ethical principles (C) related to the implementation of NIPT in Canada following round 3.**

| <b>A</b> | <b>BENEFITS</b>                                                     | <b>% of participants</b> | <b>Δ% (R3-R2)</b> |
|----------|---------------------------------------------------------------------|--------------------------|-------------------|
|          | 1. No risk of miscarriage                                           | 83.7                     | +13.0             |
|          | 2. Non-invasiveness                                                 | 63.3                     | +1.2              |
|          | 3. Results available earlier in the pregnancy                       | 53.1                     | +6.3              |
|          | 4. Requires only a blood draw                                       | 42.9                     | +5.0              |
|          | 5. Increased accuracy                                               | 30.6                     | +8.2              |
|          | 6. Enhances prospective parents' ability to prepare                 | 24.5                     | -11.7             |
|          | 7. Decreases anxiety for prospective parents                        | 16.3                     | -7.8              |
|          | 8. Provides more information potentially useful for decision-making | 16.3                     | -25.1             |
|          | 9. Answers specific needs                                           | 10.2                     | -3.6              |
|          | 10. Potential for NIPT to expand conditions tested                  | 4.1                      | -8.0              |

1  
2  
3  
4  
5  
6  
7  
8  
9  
10  
11  
12  
13  
14  
15  
16  
17  
18  
19  
20  
21  
22  
23  
24  
25  
26  
27  
28  
29  
30  
31  
32  
33  
34  
35  
36  
37  
38  
39  
40  
41

| <b>B</b> | <b>CHALLENGES</b>                                                              | <b>% of participants</b> | <b>Δ% (R3-R2)</b> |
|----------|--------------------------------------------------------------------------------|--------------------------|-------------------|
|          | 1. Adequate counselling of patients                                            | 79.6                     | +19.3             |
|          | 2. Pressure to test                                                            | 67.3                     | +10.4             |
|          | 3. Adequate education of health professionals                                  | 65.3                     | +10.1             |
|          | 4. Discrimination against disabled individuals                                 | 59.2                     | +10.9             |
|          | 5. Pressure to terminate                                                       | 55.1                     | +10.3             |
|          | 6. Eugenics                                                                    | 46.9                     | +2.1              |
|          | 7. Potential decrease in social support for disabled individuals               | 44.9                     | +1.8              |
|          | 8. Routinization of prenatal testing                                           | 38.8                     | +0.9              |
|          | 9. Stigmatization of the parents of children living with the tested conditions | 38.8                     | -0.9              |
|          | 10. Accuracy of the test                                                       | 34.7                     | -1.5              |
|          | 11. Decrease in social diversity                                               | 34.7                     | +5.4              |
|          | 12. Adequate professional guidelines                                           | 32.7                     | -5.2              |
|          | 13. Consent                                                                    | 32.7                     | +1.7              |
|          | 14. Cost of implementing NIPT                                                  | 32.7                     | -1.8              |
|          | 15. Selective pregnancy termination                                            | 32.7                     | -5.2              |
|          | 16. What conditions to test                                                    | 30.6                     | +8.2              |
|          | 17. Increased number of terminated pregnancies                                 | 30.6                     | -0.4              |
|          | 18. Conflicts of interest linked to commercialization of NIPT                  | 28.6                     | -2.4              |
|          | 19. Misperceptions of the reliability of NIPT                                  | 28.6                     | -11.1             |
|          | 20. Existence of adequate policies                                             | 28.6                     | -5.9              |
|          | 21. Respect of human rights                                                    | 26.5                     | -4.5              |
|          | 22. NIPT access-related issues                                                 | 24.5                     | -1.4              |
|          | 23. Increased anxiety for prospective parents                                  | 18.4                     | -7.5              |
|          | 24. Conflict with religious values                                             | 14.3                     | +2.2              |
|          | 25. Assigning responsibility to care for the child                             | 8.2                      | -0.4              |
|          | 26. Utility of the test                                                        | 8.2                      | -12.5             |
|          | 27. Confidentiality of the results                                             | 2.0                      | -13.5             |



| <b>C</b> | <b>PRINCIPLES</b>                                                | <b>% of participants</b> | <b>Δ% (R3-R2)</b> |
|----------|------------------------------------------------------------------|--------------------------|-------------------|
|          | 1. Informed decision-making                                      | 81.6                     | +2.3              |
|          | 2. Evidence-based decision-making                                | 59.2                     | +8.9              |
|          | 3. Respect for human dignity                                     | 53.1                     | +2.3              |
|          | 4. Equitable access                                              | 51.0                     | +7.9              |
|          | 5. Free choice                                                   | 51.0                     | -0.7              |
|          | 6. Fair resource allocation                                      | 46.9                     | +0.3              |
|          | 7. Respect for diversity                                         | 44.9                     | +1.8              |
|          | 8. Solidarity with individuals living with the tested conditions | 44.9                     | -10.3             |
|          | 9. Human rights                                                  | 40.8                     | +0.6              |
|          | 10. Equality between persons                                     | 38.8                     | +6                |
|          | 11. Non-maleficence (do not harm)                                | 36.7                     | -6.4              |
|          | 12. Autonomy                                                     | 30.6                     | -7.3              |
|          | 13. Protection of privacy                                        | 28.6                     | -5.9              |
|          | 14. Sanctity of life                                             | 28.6                     | +4.5              |
|          | 15. Inclusiveness                                                | 22.4                     | -6.9              |
|          | 16. Beneficence                                                  | 18.4                     | -5.7              |

- Supplementary file -  
Expert estimates of public opinion

| Benefits (ranking)                                                  | % of participants (R3) | Δ% (R3-R2) |
|---------------------------------------------------------------------|------------------------|------------|
| 1. No risk of miscarriage                                           | 67.3                   | -5.1       |
| 2. Non-invasiveness                                                 | 61.2                   | +7.8       |
| 3. Results available earlier in the pregnancy                       | 61.2                   | +6         |
| 4. Provides more information potentially useful for decision-making | 42.9                   | +1.5       |
| 5. Decreases anxiety for prospective parents                        | 40.8                   | -5.8       |
| 6. Requires only a blood draw                                       | 32.7                   | -3.5       |
| 7. Enhances prospective parents' ability to prepare                 | 24.5                   | -6.5       |
| 8. Increased accuracy of the test                                   | 24.5                   | +2.1       |
| 9. Potential for NIPT to expand conditions tested                   | 6.1                    | -2.5       |
| 10. Answers specific needs                                          | 4.1                    | -11.4      |

| Challenges (ranking)                                                            | % of participants (R3) | Δ% (R3-R2) |
|---------------------------------------------------------------------------------|------------------------|------------|
| 1. Cost of implementing NIPT                                                    | 63.3                   | +4.7       |
| 2. Eugenics                                                                     | 53.1                   | -0.3       |
| 3. Conflict with religious values                                               | 49.0                   | -2.7       |
| 4. Pressure to terminate                                                        | 46.9                   | +2.1       |
| 5. Discrimination against disabled individuals                                  | 42.9                   | -1.9       |
| 6. NIPT access-related issues                                                   | 42.9                   | +10.1      |
| 7. Pressure to test                                                             | 40.8                   | +4.6       |
| 8. Adequate counseling of patients                                              | 38.8                   | -9.5       |
| 9. Misperceptions of the reliability of NIPT                                    | 38.8                   | -2.6       |
| 10. Increased number of terminated pregnancies                                  | 36.7                   | +0.5       |
| 11. Accuracy of the test                                                        | 34.7                   | -3.2       |
| 12. Confidentiality                                                             | 32.7                   | +5.1       |
| 13. Consent                                                                     | 32.7                   | +12        |
| 14. What conditions to test                                                     | 32.7                   | -7         |
| 15. Respect of human rights                                                     | 32.7                   | -3.5       |
| 16. Selective termination of pregnancy                                          | 32.7                   | -19        |
| 17. Stigmatization of the parents of children living with the tested conditions | 32.7                   | +6.8       |
| 18. Adequate education of health professionals                                  | 28.6                   | +9.6       |
| 19. Adequate professional guidelines                                            | 26.5                   | +5.8       |
| 20. Conflicts of interest linked to commercialization of NIPT                   | 26.5                   | -2.8       |
| 21. Potential decrease in social support for disabled individuals               | 22.4                   | -13.8      |
| 22. Existence of adequate policies                                              | 22.4                   | 0          |
| 23. Routinization of prenatal testing                                           | 22.4                   | -1.7       |
| 24. Increased anxiety for prospective parents                                   | 16.3                   | -16.5      |
| 25. Utility of the test                                                         | 16.3                   | +6         |
| 26. Decrease in social diversity                                                | 14.3                   | +2.2       |
| 27. Assigning responsibility to care for the child                              | 12.2                   | +1.9       |

| Principles (ranking)                                              | % of participants (R3) | Δ% (R3-R2) |
|-------------------------------------------------------------------|------------------------|------------|
| 1. Free choice                                                    | 79.6                   | +8.9       |
| 2. Equitable access                                               | 63.3                   | +13.3      |
| 3. Informed decision-making                                       | 63.3                   | -2.2       |
| 4. Protection of privacy                                          | 63.3                   | -5.7       |
| 5. Fair resource allocation                                       | 53.1                   | +11.7      |
| 6. Autonomy                                                       | 42.9                   | +8.4       |
| 7. Respect for human dignity                                      | 38.8                   | -4.3       |
| 8. Sanctity of life                                               | 38.8                   | -4.3       |
| 9. Human rights                                                   | 38.8                   | -11.2      |
| 10. Evidence-based decision-making                                | 34.7                   | +0.2       |
| 11. Non-maleficence (do not harm)                                 | 30.6                   | -14.2      |
| 12. Equality between persons                                      | 28.6                   | -7.6       |
| 13. Respect for diversity                                         | 20.4                   | -14.1      |
| 14. Inclusiveness                                                 | 16.3                   | -2.7       |
| 15. Beneficence                                                   | 14.3                   | -4.7       |
| 16. Solidarity with individuals living with the tested conditions | 12.2                   | -8.5       |
